# Supplementary material
Source: HighWire-hosted journal article supplement (http://hw-f5-jim.highwire.org/highwire/filestream/141390/field_highwire_adjunct_files/2/AFMR_Podcast_70_5.pdf)
Supplement: AFMR_Podcast_70_5.pdf [file AFMR_Podcast_70_5.pdf]

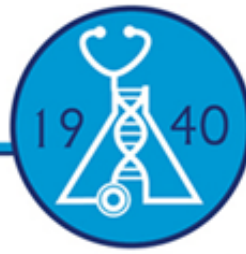

## Journal of Investigative Medicine Podcasts

[afmr.org/podcasts](http://afmr.org/podcasts)

### Covid-19 Vaccine in Children and Pregnancy

Presented Thursday, March 31, 2022

by Ihsan Al Bayati, MD

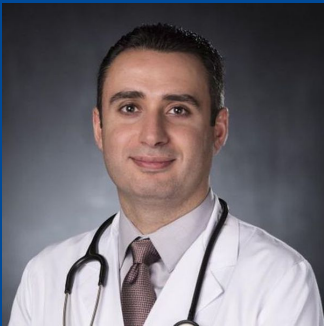

In honor of Colon Cancer Awareness Month, Editor-in-Chief Dr. Richard McCallum and Dr. Ihsan Al Bayati, Assistant Professor of Gastroenterology at TTUHSC Paul L. Foster School of Medicine, discuss different screening modalities for colon cancer, risk factors for colon cancer, Lynch syndrome, treatment, staging, and prognosis for colorectal cancer.

### Irritable Bowel Syndrome

Presented Friday, May 6, 2022

by Lucinda Harris, MD

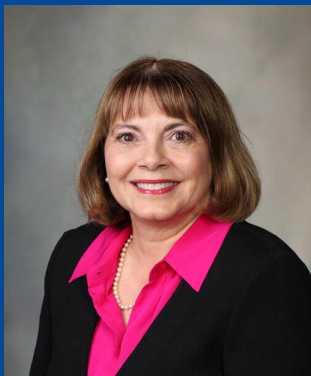

Editor-in-Chief Dr. Richard McCallum and Assistant Professor of Medicine at Mayo Clinic School of Medicine, Dr. Lucinda Harris, discuss stress and IBS, antibiotic treatment options, and new findings regarding IBS in females and military service members. Dr. Harris is also a consultant at the Division of Gastroenterology and Hepatology at Mayo Clinic Scottsdale and is a current member of the Gastroenterology Fellowship committee. Her special clinical and research interests include IBS, gastroparesis, chronic constipation, and pelvic floor disorders as well as celiac disease and autonomic disorders.
